# Supplementary material
Source: publisher figshare collection journal article supplement (https://diabetesjournals.figshare.com/ndownloader/files/22748327)

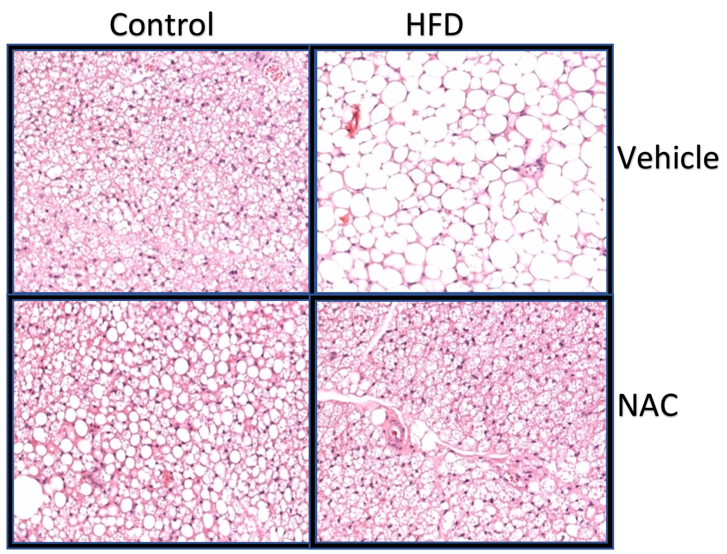


B

A

C

Supplement: Supplementary file 1 [file 22748327]
